# Supplementary material
Source: PubMed Central journal article supplement (PMC2788672)
Supplement: NIHMS150629-supplement-1_si_001.pdf [file NIHMS150629-supplement-1_si_001.pdf]

# Supporting Information

for

## *Imidazoquinones as antimalarial and anti-pneumocystis agents*

*Nuno Vale, Miguel Prudêncio, Catarina A. Marques, Margaret S. Collins, Jiri Gut, Fátima Nogueira,  
Joana Matos, Philip J. Rosenthal, Melanie T. Cushion, Virgílio E. do Rosário, Maria M. Mota,  
Rui Moreira and Paula Gomes\**

### **Contents:**

|                                                |    |
|------------------------------------------------|----|
| <b>1. HPLC traces for imidazoquinones 5a-h</b> | S2 |
| <b>2. Figure S1</b>                            | S7 |
| <b>3. Table S1</b>                             | S8 |

## 1. HPLC traces for imidazoquinines 5

### 1.1. Elution conditions

The purity degrees of all compounds were checked by HPLC using a Merck Hitachi ELITE LaChrom equipped with an L-2130 pump, an L-2200 autosampler and an L-2455 diode-array detector. Samples were injected on a Merck Purospher STAR RP-18e 125 cm×4.6 mm (5µm) column equipped with a Merck Lichrocart pre-column (Merck, Germany). Analyses were run over 20 minutes at a 1 mL/min flow rate according to either A or B elution programs (see below). The traces were recorded at 265 nm.

**A** – isocratic elution with acetonitrile/aq. sodium acetate 0.05 M 40:60 (v/v).

**B** – binary system with solvent C = 0.1% (v/v) aq. formic acid (solution C) and solvent D = acetonitrile.

Elution program: 0-3', 0% D (i.e., isocratic with 100% C); 3-5', 0 to 30% D; 5-15', 30 to 50% D; 15-20', 50% D (i.e., isocratic with C/D 1:1 v/v).

### 1.2. Chromatograms

#### Compound 5a

| <i>Solvent system</i> | <i>Retention time (min)</i> | <i>Purity (%)</i> |
|-----------------------|-----------------------------|-------------------|
| <i>B</i>              | 11.58                       | 95.09             |

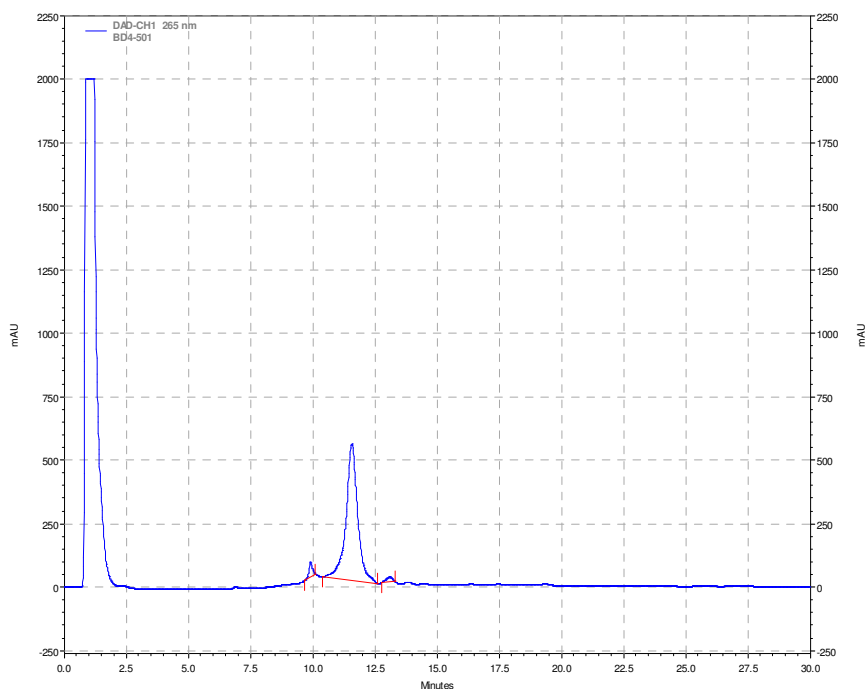

**Compound 5b**

| <i>Solvent system</i> | <i>Retention time (min)</i> | <i>Purity (%)</i> |
|-----------------------|-----------------------------|-------------------|
| <i>B</i>              | <i>9.67</i>                 | <i>99.84</i>      |

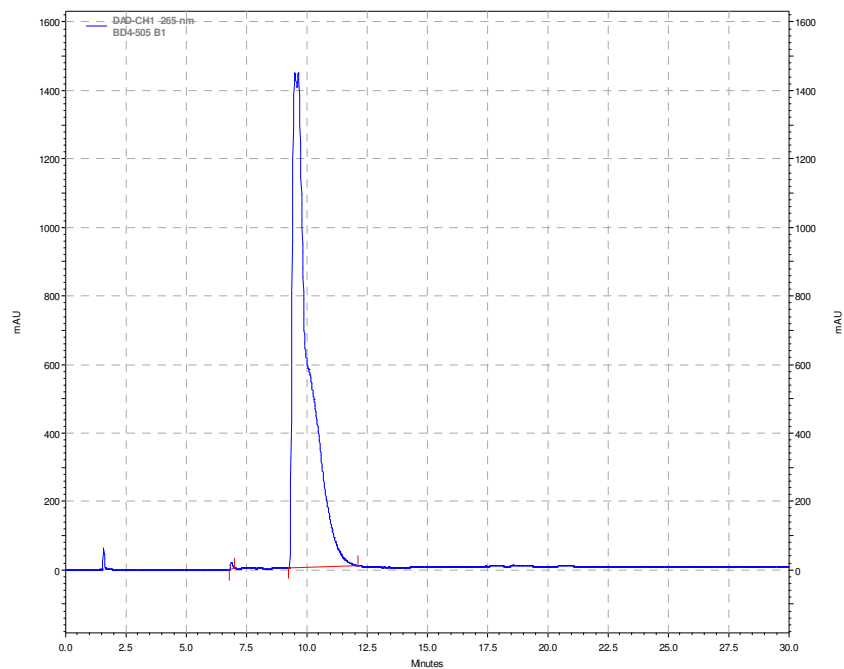

**Compound 5c**

| <i>Solvent system</i> | <i>Retention time (min)</i> | <i>Purity (%)</i> |
|-----------------------|-----------------------------|-------------------|
| <i>A</i>              | <i>10.15</i>                | <i>98.72</i>      |

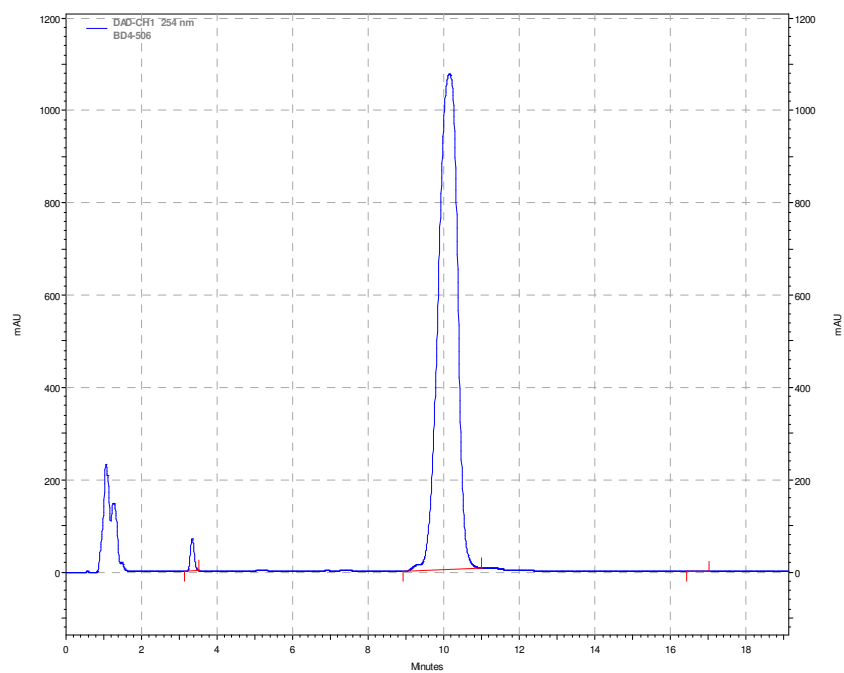

**Compound 5d**

| <b>Solvent system</b> | <b>Retention time (min)</b> | <b>Purity (%)</b> |
|-----------------------|-----------------------------|-------------------|
| A                     | 14.67                       | 98.62             |

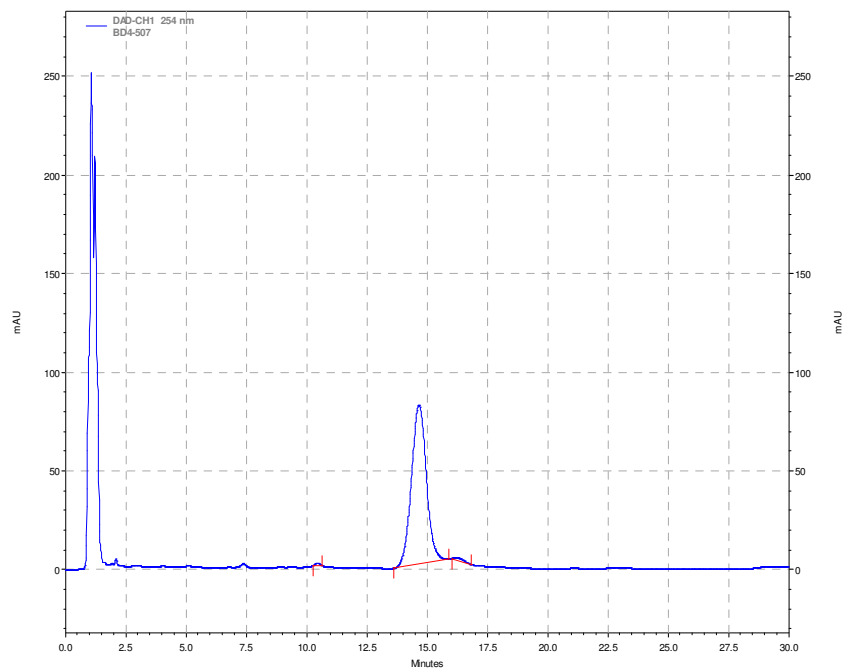

**Compound 5e**

| <b>Solvent system</b> | <b>Retention time (min)</b> | <b>Purity (%)</b> |
|-----------------------|-----------------------------|-------------------|
| A                     | 15.48                       | 99.39             |

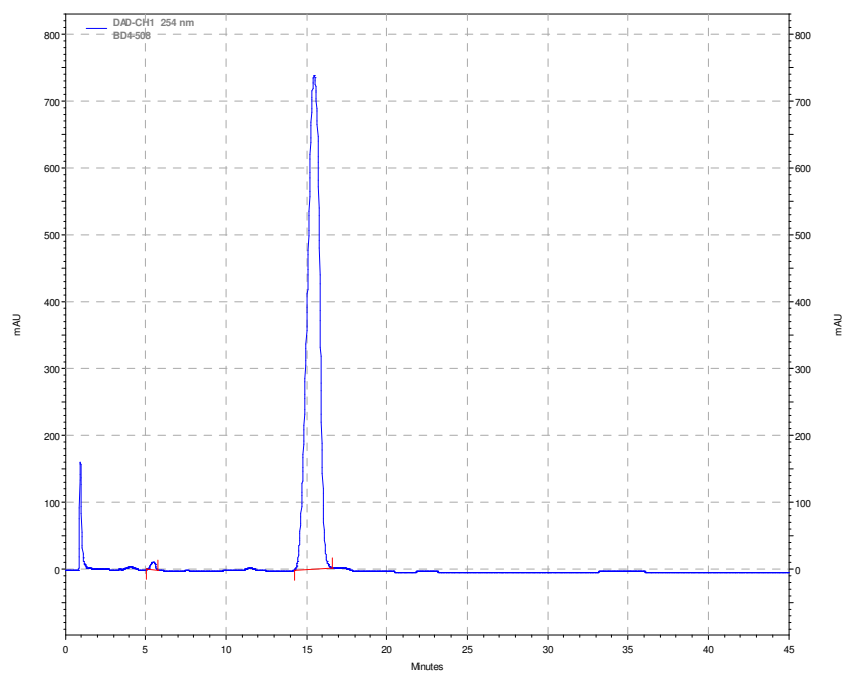

**Compound 5f**

| <b>Solvent system</b> | <b>Retention time (min)</b> | <b>Purity (%)</b> |
|-----------------------|-----------------------------|-------------------|
| A                     | 10.45                       | 98.31             |

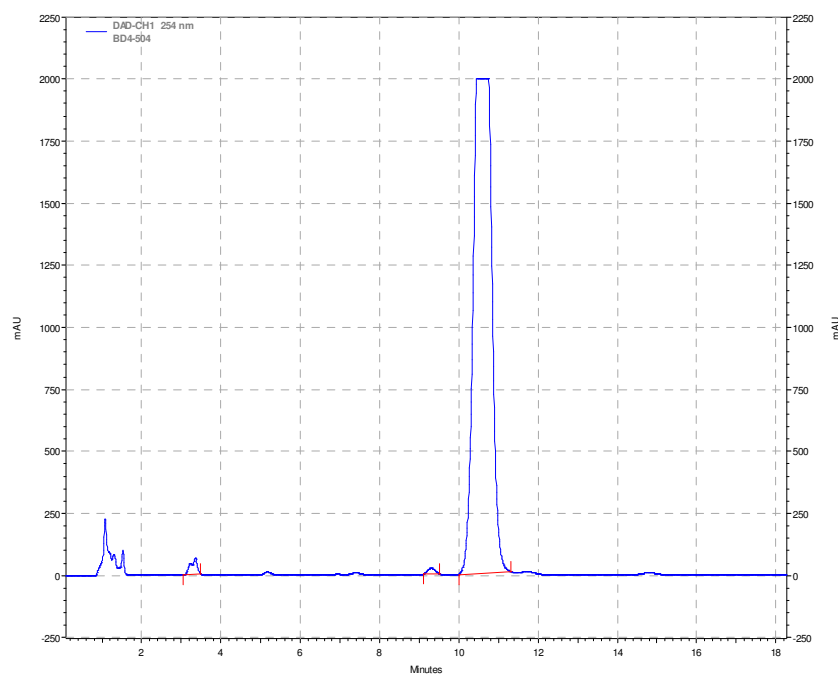

**Compound 5g**

| <b>Solvent system</b> | <b>Retention time (min)</b> | <b>Purity (%)</b> |
|-----------------------|-----------------------------|-------------------|
| A                     | 16.17                       | 96.98             |

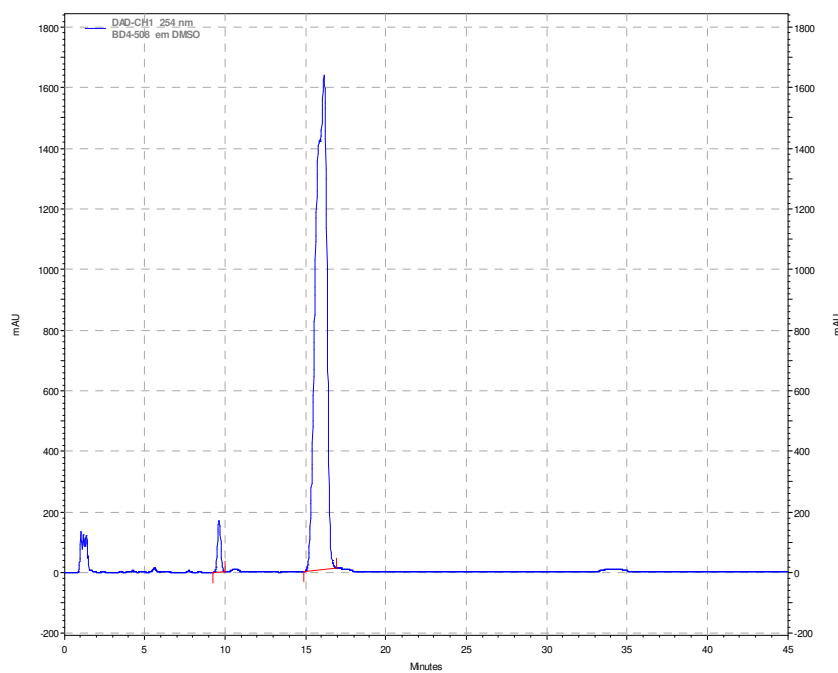

**Compound 5h**

| <i>Solvent system</i> | <i>Retention time (min)</i> | <i>Purity (%)</i> |
|-----------------------|-----------------------------|-------------------|
| <i>B</i>              | <i>17.91</i>                | <i>94.56</i>      |

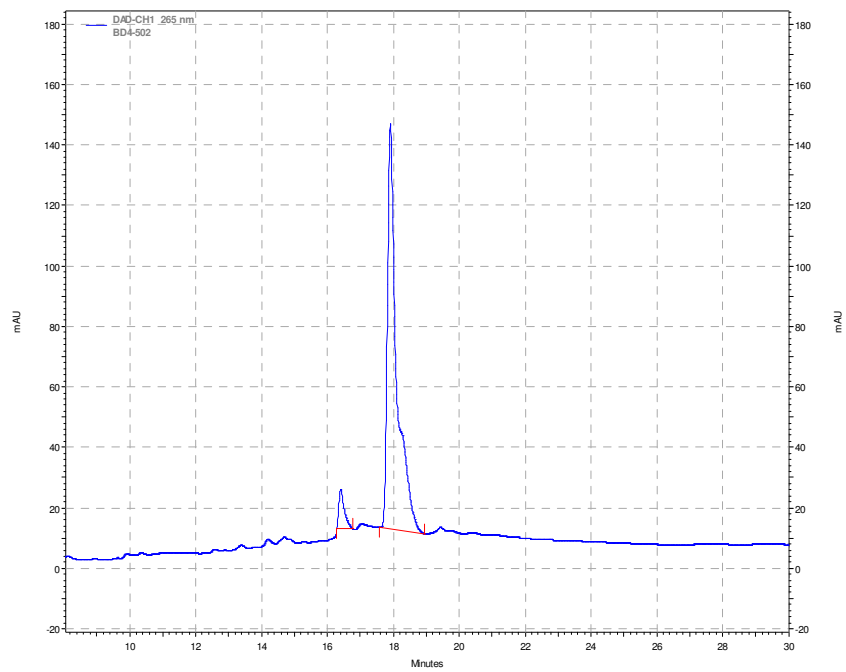

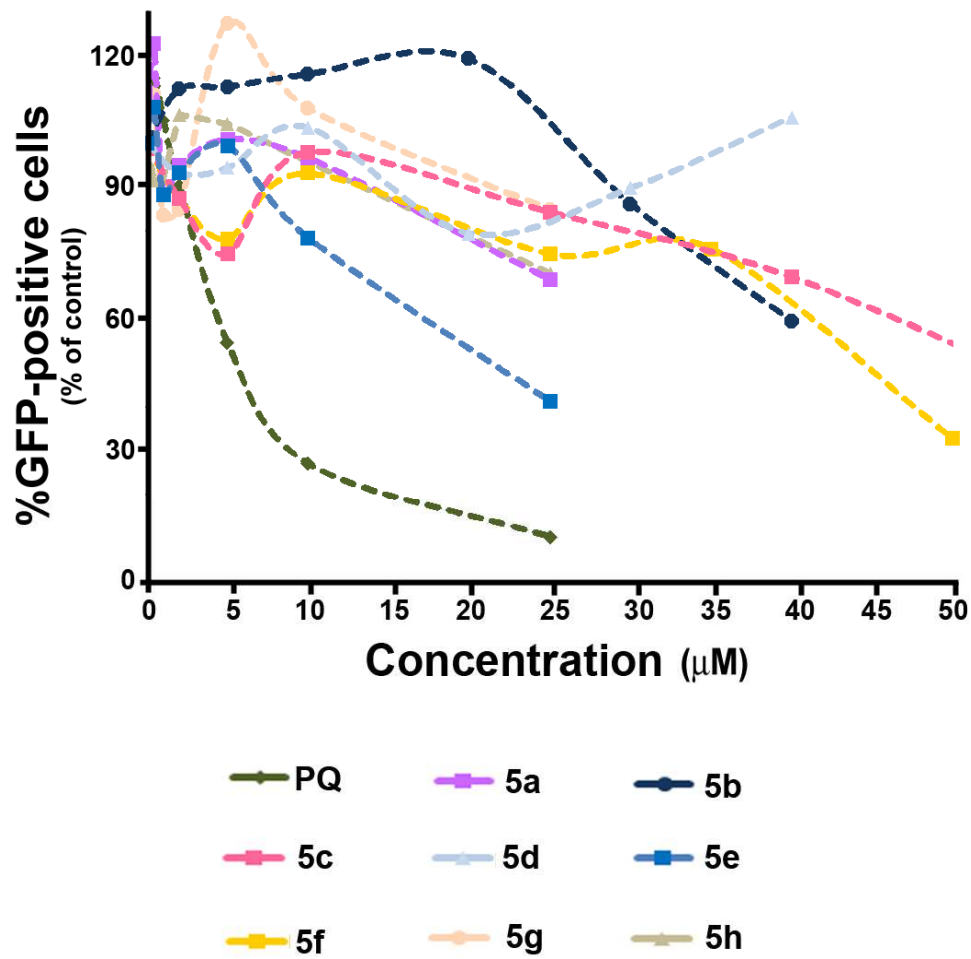

**Figure S1.** Flow cytometry-based *Plasmodium* liver stage infection assay of dose-dependencies of percentage of infected cells in the presence of increasing concentrations of the various compounds tested, relative to that of solvent-treated samples in the same experiment.

**Table S1.** Relevant parameters for preliminary ADME profiling of imidazoquinones **5a-h** (data for parent PQ, **1**, and for precursor imidazolidin-4-ones **4a,b** are also included for comparison).

| Compd     | $t_{1/2}$ /days <sup>a</sup> | LogP <sup>b</sup> | logS<br>(solubility in<br>mg/L) <sup>b</sup> | Drug<br>score <sup>c</sup> | Molecular<br>Weight<br>(g/mol) |
|-----------|------------------------------|-------------------|----------------------------------------------|----------------------------|--------------------------------|
| <b>1</b>  | -                            | 2.76              | -3.66 (56.4)                                 | 0.48                       | 259                            |
| <b>4a</b> | > 3                          | 3.07              | -3.94 (40.5)                                 | 0.81                       | 356                            |
| <b>4b</b> |                              | 3.25              | -4.10 (29.8)                                 | 0.76                       | 370                            |
| <b>5a</b> | > 3                          | 2.19              | -3.44 (150)                                  | 0.81                       | 413                            |
| <b>5b</b> |                              | 2.49              | -3.57 (120)                                  | 0.77                       | 427                            |
| <b>5c</b> |                              | 2.93              | -3.99 (46.5)                                 | 0.43                       | 455                            |
| <b>5d</b> |                              | 3.36              | -4.25 (26.6)                                 | 0.33                       | 469                            |
| <b>5e</b> |                              | 3.40              | -4.20 (29.7)                                 | 0.56                       | 469                            |
| <b>5f</b> |                              | 2.94              | -4.62 (11.7)                                 | 0.57                       | 487                            |
| <b>5g</b> |                              | 3.60              | -4.97 (5.40)                                 | 0.56                       | 503                            |
| <b>5h</b> |                              | 2.54              | -3.57 (110)                                  | 0.78                       | 427                            |

<sup>a</sup> in 80% human plasma at 37 °C;

<sup>b</sup> estimated by the ALOGPS 2.1 algorithm;<sup>45</sup>

<sup>c</sup> estimated by the Osiris Property Explorer;<sup>46</sup>
